**Title:** Ophthalmologic evidence against the interpersonal transmission of 2019 novel coronavirus through conjunctiva

**Authors:**

Yunyun Zhou <sup>1</sup>, Yuyang Zeng <sup>1</sup>, Yongqing Tong <sup>2</sup>, Changzheng Chen <sup>3,\*</sup>

<sup>1</sup> *Department of Ophthalmology, Renmin Hospital of Wuhan University, Wuhan, 430060, Hubei Province, People's Republic of China.*

<sup>2</sup> *Department of Laboratory Medicine, Renmin Hospital of Wuhan University, Wuhan, 430060, Hubei Province, People's Republic of China.*

<sup>3</sup> *Department of Ophthalmology, Renmin Hospital of Wuhan University, Wuhan, 430060, Hubei Province, People's Republic of China. [chenchangzheng@whu.edu.cn](mailto:chenchangzheng@whu.edu.cn)*

\* Corresponding author: Changzheng Chen, [chenchangzheng@whu.edu.cn](mailto:chenchangzheng@whu.edu.cn), Department of Ophthalmology, Renmin Hospital of Wuhan University, 238 Jiefang Road, Wuhan, 430060, Hubei Province, People's Republic of China.

OCRID: 0000-0002-7281-552X

1 **Abstract**

2 **Background:** The emerging 2019 novel coronavirus (2019-nCoV) has pushed several  
3 countries into state of emergency all over the world. The possible transmission of  
4 2019-nCoV by conjunctiva is controversial and has substantial public health  
5 implications.

6 **Methods:** A retrospective cohort study was initiated to investigate the possible  
7 transmission of 2019-nCoV through aerosol contact with conjunctiva. We enrolled 67  
8 cases of confirmed or suspected cases of novel coronavirus pneumonia (NCP) during  
9 17–28 Jan 2020. Nasopharyngeal and conjunctival swabs were collected for real time  
10 RT-PCR analysis to detect 2019-nCoV.

11 **Results:** 63 patients were identified as laboratory-confirmed NCP and the remaining  
12 four were suspected NCP. Conjunctival swab samples from one NCP patient yielded  
13 positive PCR results and two NCP patients yielded probable positive PCR results.  
14 None of the three patients had ocular symptoms. The only one NCP patient with  
15 conjunctivitis as the first symptom had negative conjunctival sac 2019-nCoV test.  
16 Conjunctival swab samples from the four suspected cases of NCIP were negative.

17 **Conclusion:** 2019-nCoV can be detected in the conjunctival sac of patients with NCP.  
18 Through clinical analysis, viral transmission via the conjunctival route was not  
19 supported by the data. Good clinical protection can effectively cut off the transmission  
20 path.

21

22 **Key words:** 2019-nCoV; NCP; conjunctiva

## 23 **Introduction**

24       The current outbreak of the 2019 novel coronavirus (2019-nCoV) originating in  
25       Wuhan, China has posed a threat to global public health and has been defined as a  
26       Public Health Emergency of International Concern (PHEIC) by the World Health  
27       Organization (WHO)<sup>1</sup>. Thus far, tens of thousands of confirmed cases, including  
28       healthcare workers, have been identified in China, with the latest mortality rate  
29       calculated at approximately 2.52%<sup>2</sup>. Generally, patients infected with 2019-nCoV  
30       develop respiratory illness, with the first symptoms of fever, cough and fatigue that  
31       quickly progress to pneumonia<sup>3</sup>. A number of patients were observed with  
32       extra-pulmonary manifestations at the onset of the illness, such as conjunctivitis, or  
33       even presented with asymptomatic infection<sup>4,5</sup>. Additionally, the susceptible and  
34       potential routes of viral spread from patients or asymptomatic carriers to healthy  
35       person have yet to be fully understood<sup>6</sup>. These issues pose great challenges for disease  
36       diagnosis and outbreak control, and make the goal of improving our understanding  
37       one of the upmost urgencies.

38       2019-nCoV has been identified as one of a class of single-stranded enveloped  
39       RNA viruses, belonging to the beta-coronaviruses genus of the *Coronaviridae* family  
40       that has been isolated from several mammals, including humans<sup>7</sup>. Although the  
41       genome sequence of 2019-nCoV is distinct from severe acute respiratory syndrome  
42       coronavirus (SARS-CoV) and Middle East respiratory syndrome coronavirus  
43       (MERS-CoV), they all have the potential to cause a severe acute respiratory disease  
44       and possess human-to-human transmissibility<sup>8</sup>. Similar to SARS-CoV, 2019-nCoV

45 gains entry into host cells through recognizing and binding to its potential host  
46 receptor, angiotensin-converting enzyme 2 (ACE2), which is distributed among  
47 various tissue and cell types, including the conjunctiva<sup>9-11</sup>. A previous study indicates  
48 that healthcare workers suffer from higher risk of SARS infection in the case of  
49 unprotected eye contact with secretions<sup>12</sup>. The SARS-CoV has been shown to spread  
50 through direct or indirect contact with mucous membranes in the eyes<sup>13,14</sup>. Moreover,  
51 there are increasing reports suggesting that a few novel coronavirus pneumonia (NCP)  
52 cases began with conjunctivitis as the initial symptom following contact with  
53 confirmed patients without protective goggles<sup>4,15,16</sup>. For these reasons, determining  
54 whether 2019-nCoV is capable of transmission through aerosol contact with  
55 conjunctiva is an important consideration that warrants for further exploration.

56 In view of the limited understanding and controversy surrounding knowledge of  
57 viral transmission through the conjunctival sac, we performed a retrospective cohort  
58 study designed to seek ophthalmologic evidence for the transmission of 2019-nCoV  
59 from patients via aerosol contact with the conjunctiva. The findings of this study may  
60 provide novel insights into spread routes and potential infection control measures for  
61 2019-nCoV that may help battle this outbreak.

## 62 **Methods**

### 63 *Case enrollment*

64 From 17 Jan to 28 Jan 2020, we enrolled 67 patients with either confirmed or  
65 suspected cases of NCP in the Renmin Hospital of Wuhan University.  
66 Laboratory-confirmed cases were identified with the criteria of at least one positive

67 result from a respiratory specimen using viral isolation, next-generation sequencing,  
68 or reverse transcription-polymerase chain reaction (RT-PCR) assays. Suspected cases  
69 were recruited based on the criteria of fever or signs/symptoms of lower respiratory  
70 illness (e.g. cough or shortness of breath), low or normal white-cell count or low  
71 lymphocyte count, and no reduction in symptoms after antimicrobial treatment for 3  
72 days. The history of epidemiologic exposure was also considered and incorporated<sup>17</sup>.

73 All patients invited to participate in the study provided consent for the  
74 nasopharyngeal and conjunctival swab samples. The study was approved by the  
75 Ethics Committees of Renmin Hospital of Wuhan University.

## 76 ***Study design***

77 Patient clinical details, including general information, clinical manifestations,  
78 and extra ocular symptoms, were obtained through review of health records or the  
79 implementation of questionnaire-styled interviews. General information was  
80 documented, including age, gender, underlying chronic conditions, date of symptom  
81 onset, date of hospital and ICU admission, and previous history of contact with  
82 confirmed patients or potential exposure to 2019-nCoV. The clinical manifestations  
83 included fever, cough, fatigue, shortness of breath, etc. Additionally, any ocular  
84 symptoms at the very onset, such as conjunctivitis or other ophthalmic manifestations,  
85 were solicited from all participants.

86 We took nasopharyngeal swabs and conjunctival swabs from all patients during  
87 hospitalization. Further laboratory methods were performed on these swab samples  
88 for the detection of 2019-nCoV utilizing real-time RT-PCR assays. The experimental

89 protocols are as follows: RNA extraction from conjunctival swabs and  
90 nasopharyngeal swabs was performed in preparation for subsequent one-step reverse  
91 transcription–coupled PCR reaction using a proprietary master mix containing a DNA  
92 binding dye and thermal cycler. The primers and probes for 2019-nCoV detection  
93 were selected according to the National Pathogen Resource Center (National Institute  
94 for Viral Disease Control and Prevention, China CDC), and the sequences were as  
95 follows: forward primer 5'-CCCTGTGGGTTTTACTTAA-3'; reverse primer  
96 5'-ACGATTGTGCATCAGCTGA-3'; and the probe  
97 5'-FAM-CCGTCTGCGGTATGTGGAAAGGTTATGG-BHQ1-3'. The conditions for  
98 the amplifications were 50°C for 15 min, 95°C for 3 min, followed by 45 cycles of  
99 95°C for 15 s and 60°C for 30 s<sup>18</sup>.

## 100 **Results**

101 Samples were collected from 67 patients initially suspected to have NCP over a  
102 period of 11 days (17–28 Jan 2020), of whom, 25 were male and 42 were female  
103 (Table 1). The mean age was 35.7 (SD 10.6) years (range 22–78 years). The majority  
104 were healthcare workers and female nurses. By Jan 28, 2020, 63 patients were  
105 identified as laboratory-confirmed NCP and the other four were suspected NCP. Of  
106 the four suspected NCP cases, there were two males and two females. Conjunctival  
107 swab samples from one NCP patient yielded positive PCR results, and swabs from  
108 two NCP patients yielded probable positive PCR results. None of the three patients  
109 had ocular symptoms. The only one NCP patient with conjunctivitis as the first  
110 symptom had negative conjunctival sac 2019-nCoV test. Conjunctival swabs samples

111 from the four suspected NCP cases were negative. The history of one positive case ,  
112 two probable positive cases, and one case with the first symptom of the eye were as  
113 follows:

114 Patient No. 8 was a male, 58 years old, and an emergency vehicle driver for the  
115 pre-hospital emergency team. He was admitted to the hospital because of fever and  
116 cough. The chest CT examination showed viral pneumonia. Both the nasopharyngeal  
117 and conjunctival swabs tested positive for 2019-nCoV nucleic acid. There has been no  
118 ocular discomfort. He had a history of unprotected contact with isolated patients.

119 Patient No. 24 was a male, 78 years old, and had a history of lung cancer with  
120 brain metastasis, chronic obstructive pneumonia, and hypertension. He was admitted  
121 to hospital for coughing, expectoration, and gasping. The results of 2019-nCoV RNA  
122 testing revealed that the nasopharyngeal swab was positive and the conjunctival swab  
123 was suspicious positive. There was no ocular discomfort. He had a history of contact  
124 with an NCP recessive carrier. The recessive carrier was also diagnosed with NCP and  
125 was hospitalized.

126 Patient No. 30 was a female, 29 years old, and pregnant at 36 weeks. She was a  
127 physician. She was admitted to the hospital because of fever. The results of the  
128 2019-nCoV RNA test revealed that the nasopharyngeal swab was positive and the  
129 conjunctival swab was suspicious positive. She had no ocular complaint. She had a  
130 history of contact with a confirmed NCP patient.

131 Patient No. 41 was a female, 48 years old, and an anesthesiologist. She was  
132 admitted to hospital with fever, cough, redness of eyes, itching, and secretion. The

133 results of 2019-nCoV RNA testing revealed that the nasopharyngeal swab was  
134 positive but the conjunctival swab was negative. The anesthesiologist presented with  
135 conjunctivitis as the initial symptom. The ocular symptoms were mild. The discomfort  
136 of the eye was relieved by itself without medication. She had a history of contact with  
137 a confirmed NCP patient wearing a surgical mask but no protective goggles.

## 138 **Discussion**

139 Of the cases enrolled in this study, one was positive for the conjunctival sac  
140 2019-nCoV test and two cases were suspicious positive. None of these three patients  
141 had ocular symptoms. One anesthesiologist presented with conjunctivitis as the first  
142 symptom but had a negative conjunctival sac 2019-nCoV test. There have been some  
143 reports regarding conjunctival sac and coronavirus, and coronavirus has been isolated  
144 from 7-month-old children with conjunctivitis and bronchitis<sup>19</sup>. Moreover, SARS  
145 coronavirus was detected in the tears of SARS patients, although the detection rate of  
146 coronavirus in the conjunctival sac was low<sup>20</sup>. The results of this study revealed that  
147 the incidence of conjunctivitis in patients with NCP is not high. At present, this kind  
148 of conjunctivitis has no specific manifestation, and can present in one eye or two eyes.  
149 In the early stage, it appears as common conjunctival hyperemia with fewer secretions.  
150 It is watery and akin to thin mucus. Occasionally small pieces of conjunctival  
151 hemorrhage are seen. The ocular symptoms of the patients were mild and tended to be  
152 self-healing. There was great variation between the patients.

153 Our confirmed patient No. 41 was an anesthesiologist. She developed ocular  
154 symptoms after performing intubation anesthesia for a patient, followed by fever and



155 cough. The patient was diagnosed with NCP, however during the anesthesia, the  
156 anesthesiologist wore only an ordinary surgical mask, hats, and gloves, and did not  
157 wear goggles, protective clothing, or other protective devices. Two surgeons (patient  
158 No. 10 and patient No. 40) who operated on the NCP patient were later diagnosed  
159 with NCP. The two surgeons had no ocular discomfort. General anesthesia involves  
160 tracheal intubation and may increase the risk of viral infection. Our confirmed patient  
161 No. 30 is a physician. She and her three colleagues (patient No. 28, patient No. 46,  
162 and patient No. 65) were all infected from the same patient. The conjunctival swab  
163 tests for the six infected doctors (patient No. 41, patient No. 10, patient No. 40,  
164 patient No. 28, patient No. 46, and patient No. 65) were all negative, which did not  
165 support the spread of the virus through temporary aerosol contact with the  
166 conjunctiva.

167 This is a retrospective study of a small sample size, in which there is only one  
168 time point. Negative results from conjunctival sac swabs could be influenced by the  
169 sampling amount and time, as viral conjunctivitis is self-healing. There was a certain  
170 false negative rate in the viral RNA test, and with this knowledge, we will continue to  
171 pay close attention to the progress of the patients. Additionally, we should determine  
172 whether 2019-nCoV is also present in convalescent patients as well as the infectivity  
173 of the conjunctiva.

174 Our clinical observation and analysis can serve as a reminder that all medical  
175 workers, not only ophthalmologists, must make solid efforts for protection when  
176 treating patients. Specifically, doctors must wear masks, goggles, protective clothing,

177 and gloves. Following contact with patients, close attention must be paid to hand  
178 disinfection as well as the disinfection of relevant inspection instruments and the  
179 clinical environment. The above measures can serve to cut off transmission channels  
180 and prevent cross infection in support of public health and safety.

181 In conclusion, 2019-nCoV can be detected in the conjunctival sac of patients  
182 with NCP. Through our clinical analysis, the concept that the virus is transmitted  
183 through the conjunctival route it is not supported. The prevention of and treatment for  
184 new coronavirus infectious disease requires greater attention and activity. The  
185 possibility of eye infection and the ocular route as a potential infection source should  
186 be considered and further examined, and scientific protection should be carried out.

## 187 **Conflict of Interest Statement**

188 The authors declare no conflict of interest.

## 189 **Acknowledgement**

190 The authors wish to thank the library of Wuhan University and the help of the  
191 healthcare workers from Renmin Hospital of Wuhan University.

## 192 **References**

- 193 1. Mahase E. China coronavirus: WHO declares international emergency as death toll  
194 exceeds 200. *BMJ* 2020;368:m408.
- 195 2. National Health Commission of the People's Republic of China. Pneumonia epidemic  
196 situation of new coronavirus infection on February 9, 2020. 2020. (Accessed February 10,  
197 2020, at  
198 <http://www.nhc.gov.cn/xcs/yqfkdt/202002/167a0e01b2d24274b03b2ca961107929.shtml>.)

- 199 3. Huang C, Wang Y, Li X, et al. Clinical features of patients infected with 2019 novel  
200 coronavirus in Wuhan, China. *Lancet* (London, England) 2020.
- 201 4. American Academy of Ophthalmology. Alert: Important coronavirus context for  
202 ophthalmologists. 2020. (Accessed January 28, 2020, at  
203 [https://www.aao.org/headline/alert-important-coronavirus-context.](https://www.aao.org/headline/alert-important-coronavirus-context))
- 204 5. Rothe C, Schunk M, Sothmann P, et al. Transmission of 2019-nCoV Infection from an  
205 Asymptomatic Contact in Germany. *N Engl J Med* 2020.
- 206 6. Zhang H, Kang Z, Gong H, et al. The digestive system is a potential route of 2019-nCov  
207 infection: a bioinformatics analysis based on single-cell transcriptomes. *bioRxiv*  
208 2020:2020.01.30.927806.
- 209 7. Zhu N, Zhang D, Wang W, et al. A Novel Coronavirus from Patients with Pneumonia in  
210 China, 2019. *N Engl J Med* 2020.
- 211 8. Benvenuto D, Giovannetti M, Ciccozzi A, Spoto S, Angeletti S, Ciccozzi M. The 2019-new  
212 coronavirus epidemic: evidence for virus evolution. *J Med Virol* 2020.
- 213 9. Wan Y, Shang J, Graham R, Baric RS, Li F. Receptor recognition by novel coronavirus  
214 from Wuhan: An analysis based on decade-long structural studies of SARS. *J Virol* 2020.
- 215 10. Hamming I, Timens W, Bulthuis ML, Lely AT, Navis G, van Goor H. Tissue distribution of  
216 ACE2 protein, the functional receptor for SARS coronavirus. A first step in understanding  
217 SARS pathogenesis. *J Pathol* 2004;203:631-7.
- 218 11. Holappa M, Vapaatalo H, Vaajanen A. Many Faces of Renin-angiotensin System - Focus  
219 on Eye. *Open Ophthalmol J* 2017;11:122-42.
- 220 12. Raboud J, Shigayeva A, McGeer A, et al. Risk factors for SARS transmission from

221 patients requiring intubation: a multicentre investigation in Toronto, Canada. PLoS ONE  
222 2010;5:e10717.

223 13. Peiris JSM, Yuen KY, Osterhaus ADME, Stöhr K. The severe acute respiratory syndrome.  
224 N Engl J Med 2003;349:2431-41.

225 14. Belser JA, Rota PA, Tumpey TM. Ocular tropism of respiratory viruses. Microbiol Mol Biol  
226 Rev 2013;77:144-56.

227 15. Peking University Hospital Wang Guangfa disclosed treatment status on Weibo and  
228 suspected infection without wearing goggles. 2020. (Accessed February 9, 2020, at  
229 <http://www.bjnews.com.cn/news/2020/01/23/678189.html>.)

230 16. Lu C-w, Liu X-f, Jia Z-f. 2019-nCoV transmission through the ocular surface must not be  
231 ignored. The Lancet.

232 17. Li Q, Guan X, Wu P, et al. Early Transmission Dynamics in Wuhan, China, of Novel  
233 Coronavirus-Infected Pneumonia. N Engl J Med 2020.

234 18. Institute of Virus Disease Control and Prevention, China CDC. Primers and probes for  
235 detection of the novel coronavirus. 2020. (Accessed February 3, 2020, at  
236 [http://ivdc.chinacdc.cn/kyjz/202001/t20200121\\_211337.html](http://ivdc.chinacdc.cn/kyjz/202001/t20200121_211337.html).)

237 19. van der Hoek L, Pyrc K, Jebbink MF, et al. Identification of a new human coronavirus. Nat  
238 Med 2004;10:368-73.

239 20. Loon SC, Teoh SC, Oon LL, et al. The severe acute respiratory syndrome coronavirus in  
240 tears. The British journal of ophthalmology 2004;88:861-3.

241

242 Table 1. Signalment for 67 patients and viral detection results of nasopharyngeal and

243 conjunctival samples.

| Patient No. | Sex | Age | 2019-nCoV RNA test: nasopharyngeal swab | 2019-nCoV RNA test: conjunctival swab |
|-------------|-----|-----|-----------------------------------------|---------------------------------------|
| 1           | M   | 28  | +                                       | -                                     |
| 2           | F   | 37  | +                                       | -                                     |
| 3           | F   | 28  | +                                       | -                                     |
| 4           | M   | 36  | -                                       | -                                     |
| 5           | M   | 57  | +                                       | -                                     |
| 6           | M   | 23  | +                                       | -                                     |
| 7           | F   | 32  | +                                       | -                                     |
| 8           | M   | 58  | +                                       | +                                     |
| 9           | M   | 36  | +                                       | -                                     |
| 10          | M   | 37  | +                                       | -                                     |
| 11          | F   | 35  | +                                       | -                                     |
| 12          | F   | 45  | +                                       | -                                     |
| 13          | F   | 40  | +                                       | -                                     |
| 14          | F   | 25  | +                                       | -                                     |
| 15          | F   | 31  | +                                       | -                                     |
| 16          | F   | 52  | +                                       | -                                     |
| 17          | M   | 31  | +                                       | -                                     |
| 18          | F   | 35  | -                                       | -                                     |
| 19          | F   | 28  | +                                       | -                                     |
| 20          | F   | 60  | +                                       | -                                     |

---

|    |   |    |   |   |
|----|---|----|---|---|
| 21 | F | 30 | + | - |
| 22 | F | 31 | - | - |
| 23 | F | 26 | + | - |
| 24 | M | 78 | + | ± |
| 25 | F | 56 | + | - |
| 26 | M | 30 | + | - |
| 27 | F | 35 | + | - |
| 28 | F | 34 | + | - |
| 29 | F | 44 | + | - |
| 30 | F | 29 | + | ± |
| 31 | F | 26 | + | - |
| 32 | F | 32 | + | - |
| 33 | F | 30 | + | - |
| 34 | F | 51 | + | - |
| 35 | F | 22 | + | - |
| 36 | F | 29 | + | - |
| 37 | F | 55 | + | - |
| 38 | F | 34 | + | - |
| 39 | F | 29 | + | - |
| 40 | M | 36 | + | - |
| 41 | F | 48 | + | - |
| 42 | F | 35 | + | - |

---

---

|    |   |    |   |   |
|----|---|----|---|---|
| 43 | M | 31 | + | - |
| 44 | M | 38 | + | - |
| 45 | M | 42 | + | - |
| 46 | M | 32 | + | - |
| 47 | M | 31 | + | - |
| 48 | F | 25 | + | - |
| 49 | F | 45 | + | - |
| 50 | F | 22 | + | - |
| 51 | M | 37 | + | - |
| 52 | M | 38 | + | - |
| 53 | F | 48 | + | - |
| 54 | F | 28 | + | - |
| 55 | M | 32 | - | - |
| 56 | F | 28 | + | - |
| 57 | F | 31 | + | - |
| 58 | F | 26 | + | - |
| 59 | M | 28 | + | - |
| 60 | M | 30 | + | - |
| 61 | F | 39 | + | - |
| 62 | F | 27 | + | - |
| 63 | F | 31 | + | - |
| 64 | M | 40 | + | - |

---

---

|    |   |    |   |   |
|----|---|----|---|---|
| 65 | M | 30 | + | - |
| 66 | M | 30 | + | - |
| 67 | M | 27 | + | - |

---

244 2019-nCoV, 2019 novel coronavirus; F, female; M, male; +, positive result; -, negative result;

245 ±, suspicious positive
